# Supplementary material
Source: publisher site journal article supplement (https://mbmg.pensoft.net/article/download/suppl/4035237/)
Supplement: Supplementary file 1

## Sheet: Sheet1
Sample Number	Number of Reads (paired-end)	Taxon
1	63709	Merino
2	45324	Goat
3	49318	Goat
4	37120	Merino
5	43957	Goat
6	39586	Dorper
7	65873	Merino
8	40287	Dorper
9	30434	Goat
10	33493	Goat
11	22352	Dorper
12	47188	Merino
13	29556	Goat
14	74296	Dorper
15	58231	Merino
16	43037	Dorper
17	69163	Dorper
18	52984	Merino
19	27009	Dorper
20	67384	Merino
21	83220	Dorper
22	27077	Goat
23	34972	Merino
24	24543	Merino
